# Supplementary material for: Preparation and investigation of 1-(3-aminopropyl)imidazole functionalized polyvinyl chloride/poly(ether ketone cardo) membranes for HT-PEMFCs
Source: Royal Society of Chemistry journal article supplement (doi:10.1039/d0se01123a), 2020-01-01
Supplement: d0se01123a1.pdf [file d0se01123a1.pdf]

## Supporting Information

### Preparation and investigation of 1-(3-aminopropyl)imidazole functionalized polyvinyl chloride/poly (ether ketone cardo) membranes for HT-PEMFCs

Ruihong Liu<sup>a</sup>, Xuefu Che<sup>a</sup>, Xiong Chen<sup>a</sup>, Hao Li<sup>a</sup>, Jianhao Dong<sup>a</sup>, Zhe Hao<sup>b</sup>, Jingshuai Yang<sup>a,\*</sup>

<sup>a</sup> Department of Chemistry, College of Sciences, Northeastern University, Shenyang 110819, China, \*Corresponding author (E-mail: yjs@mail.neu.edu.cn)

<sup>b</sup> College of Environmental Sciences, Liaoning University, Shenyang 110036, China

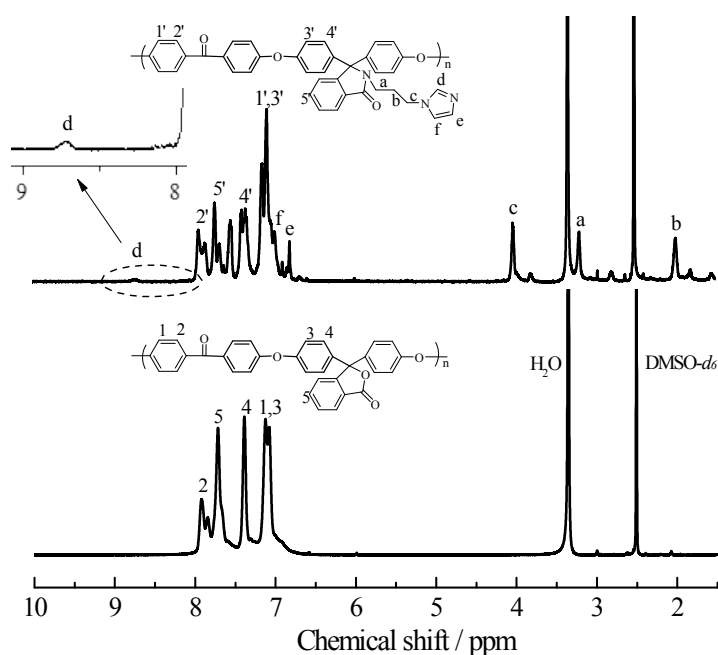

Fig. S1 <sup>1</sup>H NMR spectra of PEK-C and PEK-C/APIm polymers

The chemical structures of PEK-C and PEK-C/APIm were confirmed by <sup>1</sup>H NMR in DMSO-*d*<sub>6</sub>. The characteristic peaks ranging from 6.5 to 8.0 ppm were assigned to aromatic phenyl in PEK-C, which is in a good agreement with the literature.<sup>1-3</sup> For PEK-C/APIm, the characteristic absorptions at 1.99, 3.19 and 4.02 ppm (H<sub>b</sub>, H<sub>a</sub> and H<sub>c</sub>) were attributed to different methylene groups in the APIm side-chain,<sup>4</sup> while the characteristic peaks at 6.89, 7.02 and 7.92 ppm (H<sub>e</sub>, H<sub>f</sub> and H<sub>d</sub>) resulted from the end group of imidazole. The <sup>1</sup>H NMR results indicate that 1-(3-aminopropyl) imidazole (APIm) can successfully react with PEK-C polymer through the reaction between the amino group and lactone group via lactamation reaction.

#### References:

- [1] Q. Zhang, F. Gong, S. Zhang and S. Li, *J. Membr. Sci.*, 2011, **367**, 166-173.
- [2] J. Zhu, J. Zheng, Q. Zhang and S. Zhang, *J. Appl. Polym. Sci.*, 2016, **133**, 42809-42819.
- [3] Y. Zhuo, A. Lai, Q. Zhang, A. Zhu, M. Ye and Q. Liu, *J. Membr. Sci.*, 2015, **491**, 138-148.
- [4] X. Dong, S. Hou, H. Mao, J. Zheng and S. Zhang, *J. Membr. Sci.*, 2016, **518**, 31-39.
